# Supplementary material
Source: Springer Nature journal article supplement (https://www.springermedizin.de/resource/supplementary/12911_2011_447_MOESM6_ESM.pdf/9525766)
Supplement: MOESM6 [file 9525766]

| <b>Patients for all practices</b>         | <b>Unique patients seen in office</b> | <b>Patients who use the IPHR</b> |
|-------------------------------------------|---------------------------------------|----------------------------------|
| Number of unique patients age 18-75 years | 50,124                                | 7,235 (14.4%)                    |
| Gender (percent male)                     | 41%                                   | 47%                              |
| Age                                       |                                       |                                  |
| • Percent 18-49 years                     | 66%                                   | 56%                              |
| • Percent 50-64 years                     | 27%                                   | 36%                              |
| • Percent 65-75 years                     | 7%                                    | 8%                               |

| <b>Patients by practice</b> | <b>Unique patients seen in office</b> | <b>Patients who use the IPHR</b> |
|-----------------------------|---------------------------------------|----------------------------------|
| Practice #1                 | 6,573                                 | 1,650 (25.1%)                    |
| Practice #2                 | 2,122                                 | 223 (10.5%)                      |
| Practice #3                 | 5,570                                 | 815 (14.6%)                      |
| Practice #4                 | 1,149                                 | 186 (16.2%)                      |
| Practice #5                 | 5,069                                 | 406 (8.0%)                       |
| Practice #6                 | 1,179                                 | 203 (17.2%)                      |
| Practice #7                 | 2,859                                 | 444 (15.5%)                      |
| Practice #8                 | 4,952                                 | 1,139 (23.0%)                    |
| Practice #9                 | 4,439                                 | 1,255 (28.3%)                    |
| Practice #10                | 2,528                                 | 199 (7.9%)                       |
| Practice #11                | 8,700                                 | 472 (5.4%)                       |
| Practice #12                | 2,286                                 | 131 (5.7%)                       |
| Practice #13                | 1,259                                 | 19 (1.5%)                        |
| Practice #14                | 1,439                                 | 91 (6.3%)                        |

| <b>Use of IPHR</b>                            |                      |  |
|-----------------------------------------------|----------------------|--|
| Visitors per month                            | 2,595                |  |
| Average number of visits per visitor          | 4.2                  |  |
| Average time spent on the site                | 7 minutes 21 seconds |  |
| Average number of IPHR pages viewed per visit | 8.45                 |  |
